# Supplementary material for: Carboxylated ‘locking unit’ directed ratiometric probe design, synthesis and application in selective recognition of Fe3+/Cu2+
Source: Royal Society of Chemistry journal article supplement (doi:10.1039/c3ra23442h), 2013-01-01
Supplement: c3ra23442h.pdf [file c3ra23442h.pdf]

## “Carboxylated ‘locking unit’ directed ratiometric probe design, synthesis and application in selective recognition of Fe<sup>3+</sup>/Cu<sup>2+</sup>”

Sougata Sinha,<sup>a</sup> Sunil Kumar,<sup>a</sup> Rik Rani Koner,<sup>a</sup> Jomon Mathew,<sup>b</sup> Chayan K. Nandi,<sup>a,\*</sup> Subrata Ghosh<sup>a,\*</sup>

<sup>a</sup>*School of Basic Sciences, Indian Institute of Technology Mandi, Mandi-175001, H.P, India*

<sup>b</sup>*Schulich Faculty of Chemistry and the Lise Meitner Minerva Center for Computational Quantum Chemistry, Technion-Israel Institute of Technology, Haifa, Israel*

\*Corresponding authors: Tel. +91-1905-237917; Fax: +91-1905-237924 (C. K. Nandi)

Tel. +91-1905-237926; Fax: +91-1905-237924 (S. Ghosh)

E-mail address: [chayan@iitmandi.ac.in](mailto:chayan@iitmandi.ac.in) (C. K. Nandi)

[subrata@iitmandi.ac.in](mailto:subrata@iitmandi.ac.in) (S. Ghosh)

### *Supporting Information*

#### **Content**

1. General information
2. Synthesis of compound **1**, **5**, and **6**.
3. Absorption Spectra of **1** in the presence of Fe<sup>3+</sup>, and Cu<sup>2+</sup>
4. Absorption and emission spectra of **5**
5. Absorption and emission spectra of **6**
6. Limit of detection calculation
7. Binding constant calculation
8. Job's plot
9. ESI mass spectra
10. Metal ion selectivity profile
11. <sup>1</sup>H NMR and <sup>13</sup>C NMR spectra
12. References

## General Information

The solvents and reagents were purchased from commercial sources. The reagents were used without any further purification unless and otherwise stated. The solvents were distilled prior to use, and the spectroscopic grade solvents were used for the spectroscopic measurements. Chloride salts of  $\text{Li}^+$ ,  $\text{Na}^+$ ,  $\text{K}^+$ ,  $\text{Ca}^{2+}$ ,  $\text{Mg}^{2+}$ ,  $\text{Mn}^{2+}$ ,  $\text{Fe}^{3+}$ ,  $\text{Cu}^{2+}$ ,  $\text{Hg}^{2+}$ ,  $\text{Zn}^{2+}$ ,  $\text{Al}^{3+}$ ,  $\text{Cd}^{2+}$ , and  $\text{Co}^{2+}$ , nitrate salts of  $\text{Sr}^{2+}$ ,  $\text{Pb}^{2+}$ ,  $\text{Ag}^+$ ,  $\text{Ba}^{2+}$ ,  $\text{Ni}^{2+}$  and  $\text{NH}_4^+$ , and sulphate salt of  $\text{Fe}^{2+}$  were used during the spectroscopic measurements. TLC was done on Merck silica gel plates (60F254) with a fluorescent indicator.  $^1\text{H}$  and  $^{13}\text{C}$  NMR spectra were recorded on Bruker Avance II 400 and Bruker Avance 300 MHz spectrometers Spectrometer in  $\text{CDCl}_3$  and  $\text{DMSO}-d_6$ . UV-vis and fluorescence spectra were recorded on a Simadzu UV-2450 spectrophotometer and Cary Eclipse Fluorescence spectrophotometer respectively. The excitation wavelength was fixed at 297 nm ( $\lambda_{\text{ex}} = 297 \text{ nm}$ ) in case of fluorescence measurements at 25 °C in a 1 cm quartz cell with a slit width of 5 nm for both excitation and emission. FT-IR and mass spectra were recorded on a Perkin Elmer Spectrum 2 spectrophotometer and Q-TOF micromass spectrometer respectively. All the spectral measurements were done after 4 hrs of the preparation of solution of compound **1**. (2-formyl-phenoxy)-acetyl acid was prepared following a literature procedure.<sup>1</sup>

**Preparation of 2-(2-((E)-(9-ethyl-9H-carbazol-3-ylimino)methyl)phenoxy)acetic acid (1):** To the methanolic solution of 3-amino-9-ethyl carbazole **4** (421 mg, 2 mmol), (2-formyl-phenoxy)-acetyl acid **3** (360 mg, 2 mmol) was added at room temperature. The mixture was kept stirring at 70 °C. A deep orange product which was precipitated out after 30 min of stirring was isolated by filtration. The isolated product was washed with methanol several times and dried under vacuum. This yielded 521 mg of pure product (70%) which was characterized using common spectroscopic tools like FT-IR, NMR and mass spectrometry (Scheme 1).

Deep orange powder; Melting point: 130 °C; FT-IR (KBr,  $\nu$  in  $\text{cm}^{-1}$ ): 748, 890, 1059, 1128, 1156, 1236, 1281, 1332, 1369, 1383, 1457, 1474, 1486, 1650, 1718, 1916, 2933, 2978, 3052, 3426;  $^1\text{H-NMR}$  (400 MHz,  $\text{DMSO-}d_6$ )  $\delta$  1.33 (t,  $J = 7.0$  Hz, 3H), 4.45 (q,  $J = 6.9$  Hz, 2H), 4.88 (s, 2H), 7.09-7.14 (m, 2H), 7.21 (t,  $J = 7.4$  Hz, 1H), 7.45-7.51 (m, 3H), 7.59-7.65 (m, 2H), 8.11-8.13 (m, 2H) 8.22 (d,  $J = 7.7$  Hz, 1H), 9.13 (s, 1H);  $^{13}\text{C-NMR}$  (100 MHz,  $\text{CDCl}_3+\text{DMSO-}d_6$ )  $\delta$  13.53, 37.15, 65.22, 108.63, 108.79, 112.12, 112.51, 118.55, 119.81, 120.18, 121.16, 122.32, 122.72, 124.96, 125.66, 126.95, 131.86, 138.16, 139.97, 143.71, 153.22, 157.51, 169.89; MS (TOF-ES):  $m/z$  calculated for  $\text{C}_{23}\text{H}_{21}\text{N}_2\text{O}_3$   $[\text{MH}]^+$  373.16, found 373.35.

**Preparation of 2-((E)-(9-ethyl-9H-carbazol-3-ylimino)methyl)phenol (5):** To a methanolic solution of 3-amino-9-ethyl carbazoleamine (2 mmol, 420.5 mg) was added salicylaldehyde (2 mmol, 244 mg) and left stirring for 30 minutes at room temperature. The yellow coloured solid precipitate was isolated through filtration, washed with ethanol several times and dried under vacuum. 525 mg (83% yield) of pure compound **5** was obtained as yellow powder and the same was characterized using common spectroscopic tools like FT-IR, NMR and mass spectrometry (Scheme 1).

Yellow powder; Melting point: 107 °C; FT-IR (KBr,  $\nu$  in  $\text{cm}^{-1}$ ): 742, 802, 857, 862, 917, 1147, 1234, 1283, 1321, 1354, 1382, 1453, 1485, 1595, 1617, 2863, 2978, 3049;  $^1\text{H-NMR}$  (300 MHz,  $\text{CDCl}_3$ )  $\delta$  1.47 (t,  $J = 7.3$  Hz, 3H), 4.38 (q,  $J = 7.1$  Hz, 2H), 6.99 (t,  $J = 7.4$  Hz, 1H), 7.10 (d,  $J = 8.2$  Hz, 1H), 7.29 (t,  $J = 7.1$ , 1H), 7.38 - 7.56 (m, 6H), 8.08 (brs, 1H), 8.16 (d,  $J = 7.7$  Hz 1H), 8.79 (s, 1H), 13.79 (s, 1H);  $^{13}\text{C-NMR}$  (75MHz,  $\text{CDCl}_3$ )  $\delta$  14.25, 38.14, 109.22, 109.37, 113.04, 117.57, 119.34, 119.56, 120.19, 121.06, 123.33, 123.99, 126.58, 132.29, 132.84, 139.53, 140.58, 141.02, 160.25, 161.48; MS (TOF-ES):  $m/z$  calculated for  $\text{C}_{21}\text{H}_{19}\text{N}_2\text{O}$   $[\text{MH}]^+$  315.15, found 315.63.

**Preparation of 2-((9-ethyl-9H-carbazol-3-ylamino)methyl)phenol (6):** To a methanolic solution (10 ml) of compound **5** (2 mmol, 628 mg) NaBH<sub>4</sub> ( 2.4 mmol, 91 mg) was added slowly and the reaction mixture was left stirring for one hour. After completion of the reaction (as judged by the TLC) the solvent was reduced to 1 ml under vacuum and then water (3 ml) was slowly added to the reaction mixture. When the pH of the resulting solution was adjusted to pH 6 by adding dilute HCl, appearance of white precipitate was observed. The precipitate was filtered, washed 6 times (5 ml x 6) with water, and dried under vacuum for several hours. The product was obtained as off-white solid powder (475 mg, 75%) and found to be sufficiently pure for spectroscopic studies.

Off-white powder; Melting point: 138 °C; FT-IR (KBr,  $\nu$  in cm<sup>-1</sup>): 747, 813, 862, 977, 966, 1070, 1152, 1207, 1234, 1289, 1311, 1343, 1469, 1485, 1507, 1589, 2901, 2972, 3049, 3322; <sup>1</sup>H-NMR (300 MHz, CDCl<sub>3</sub>)  $\delta$  1.42 (t, J = 7.2 Hz, 3H), 4.35 (q, J = 7.2 Hz, 2H), 4.56 (s, 2H), 6.91 - 6.96 (m, 2H), 7.08 - 7.50 (m, 7H), 7.64-7.65 (m, 1H), 8.03 (d, J = 7.7 Hz, 1H); <sup>13</sup>C-NMR (75 MHz, CDCl<sub>3</sub>)  $\delta$  14.24, 37.98, 51.48, 108.36, 109.55, 117.12, 118.85, 120.21, 120.85, 122.90, 123.53, 123.87, 126.18, 128.99, 129.54, 136.27, 139.93, 140.85, 157.86; MS (TOF-ES):  $m/z$  calculated for C<sub>21</sub>H<sub>21</sub>N<sub>2</sub>O [MH]<sup>+</sup> 317.16, found 317.61.

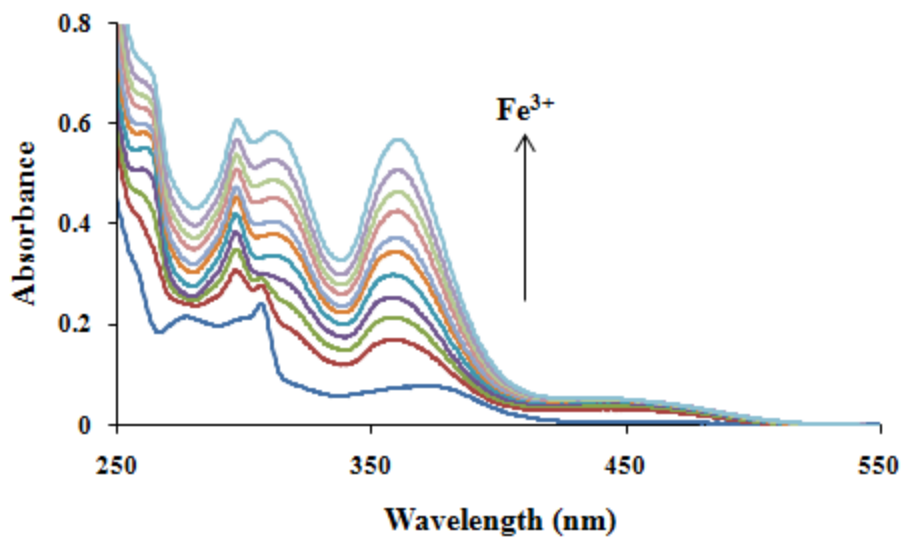

**Figure S1:** UV-vis absorption titration profile of compound **1** (10 μM) in the presence of 0-20 μM of Fe<sup>3+</sup> ion.

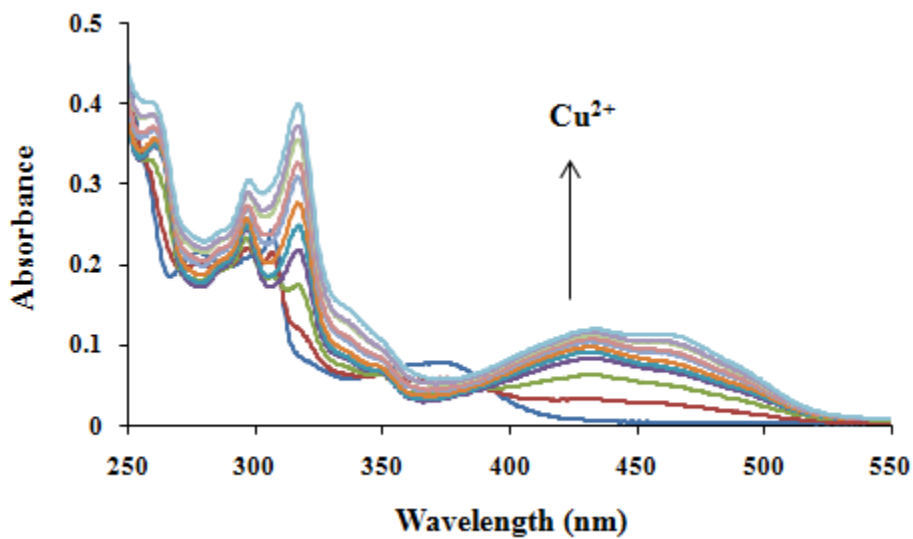

**Figure S2:** UV-vis absorption titration profile of compound **1** (10 μM) in the presence of 0-20 μM of Cu<sup>2+</sup> ion.

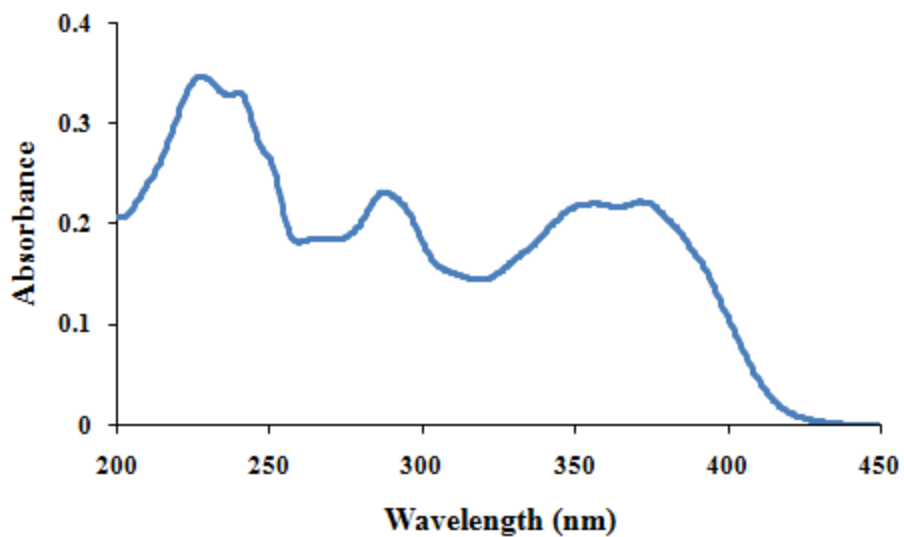

(a)

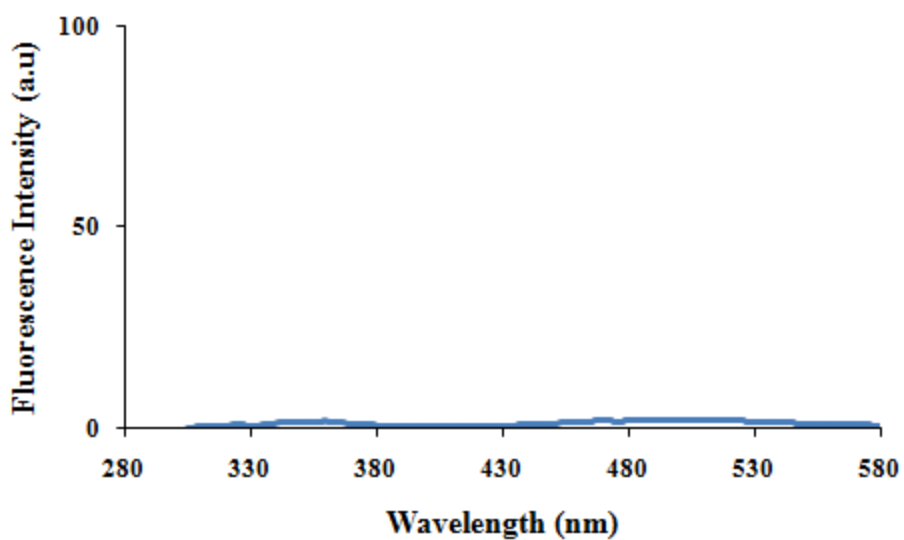

(b)

**Figure S3 :** (a) Absorption spectra of compound **5**, (b) Emission spectra of compound **5** ( $\lambda_{ex} = 297$  nm).

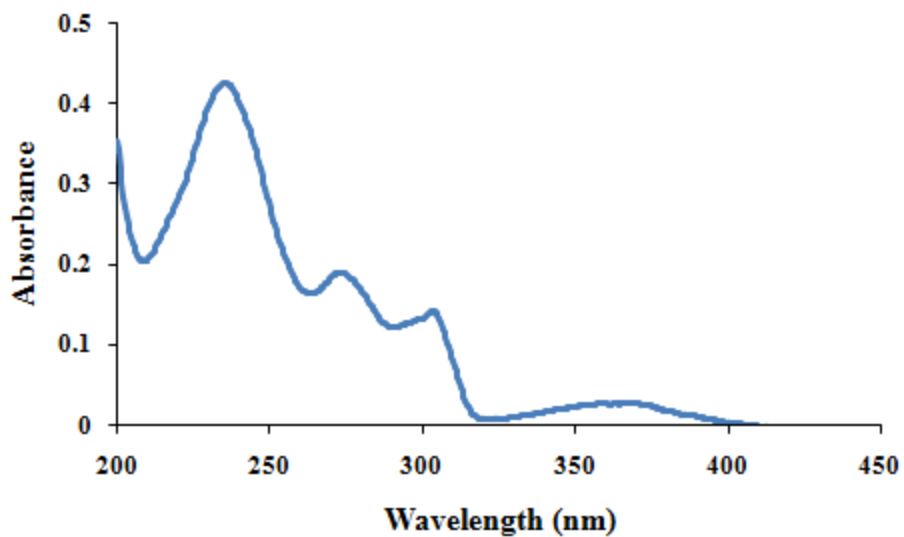

(a)

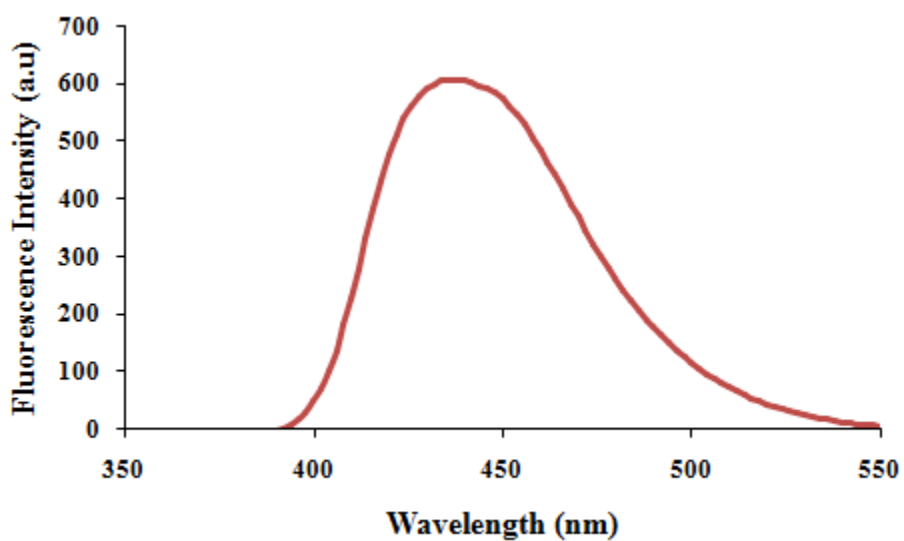

(b)

**Figure S4** : (a) Absorption spectra of compound **6**, (b) Emission spectra of compound **6** ( $\lambda_{ex}$  = 297 nm).

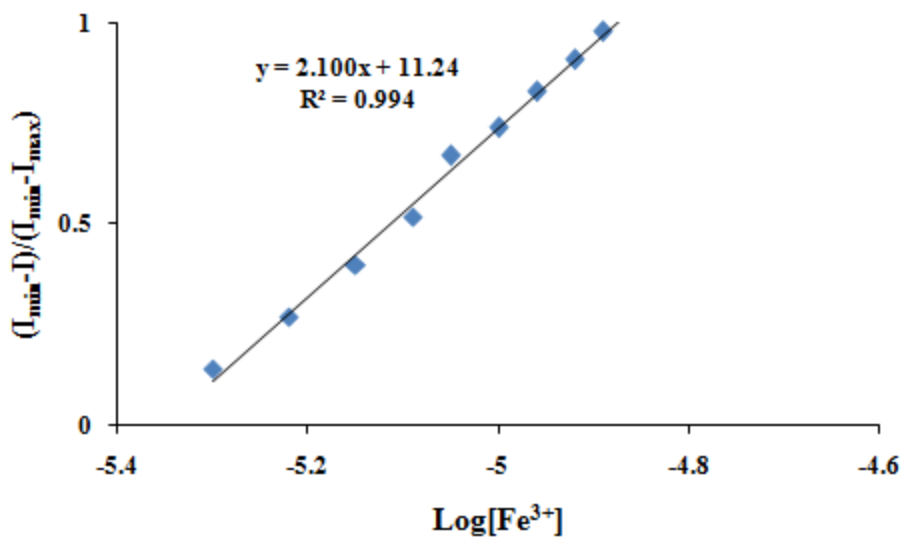

(a)

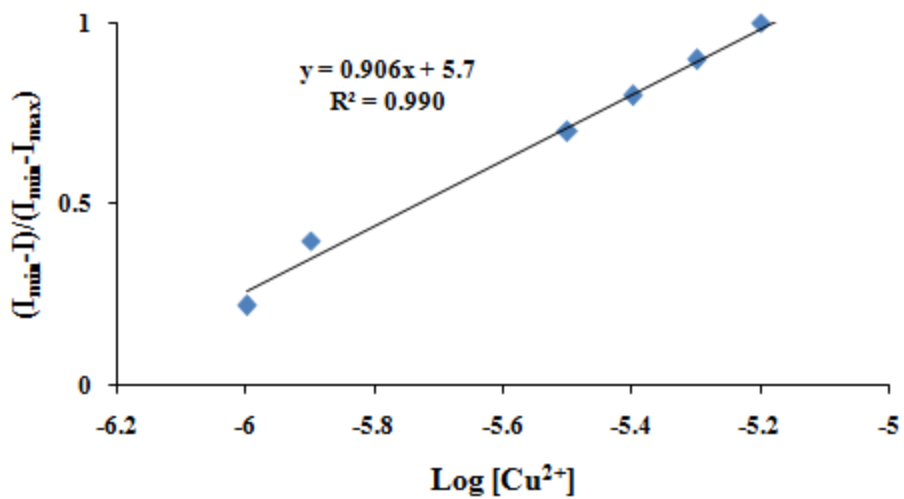

(b)

**Figure S5:** Limit of detection calculation<sup>2</sup> for (a)  $1\text{-Fe}^{3+}$  and (b)  $1\text{-Cu}^{2+}$ .



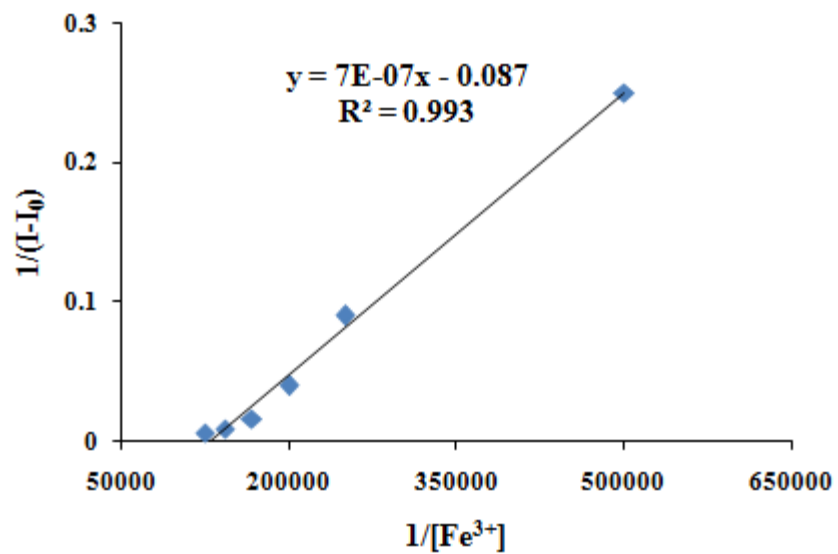

(a)

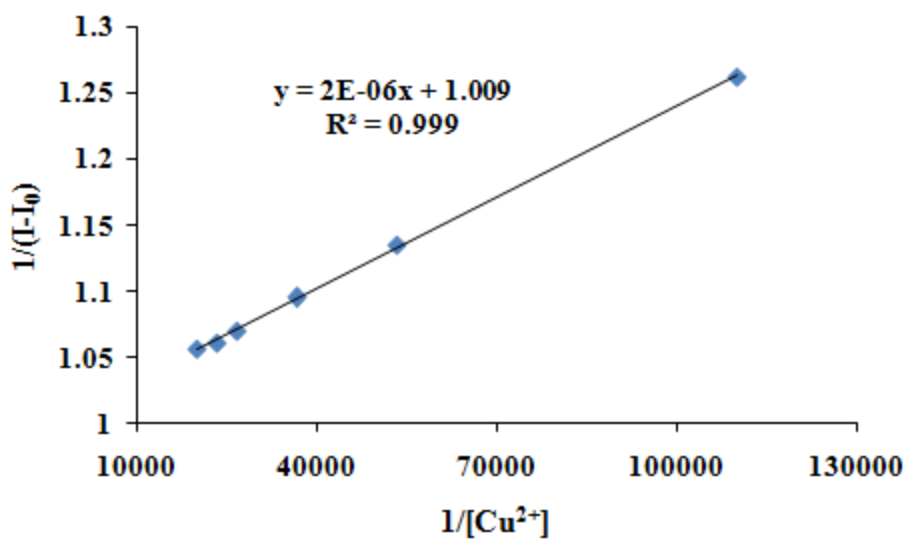

(b)

**Figure S6:** Binding constants calculation: (a) 1-Fe<sup>3+</sup> and (b) 1-Cu<sup>2+</sup> (from spectrofluometric titration using Benesi-Hildebrand equation).<sup>3</sup>

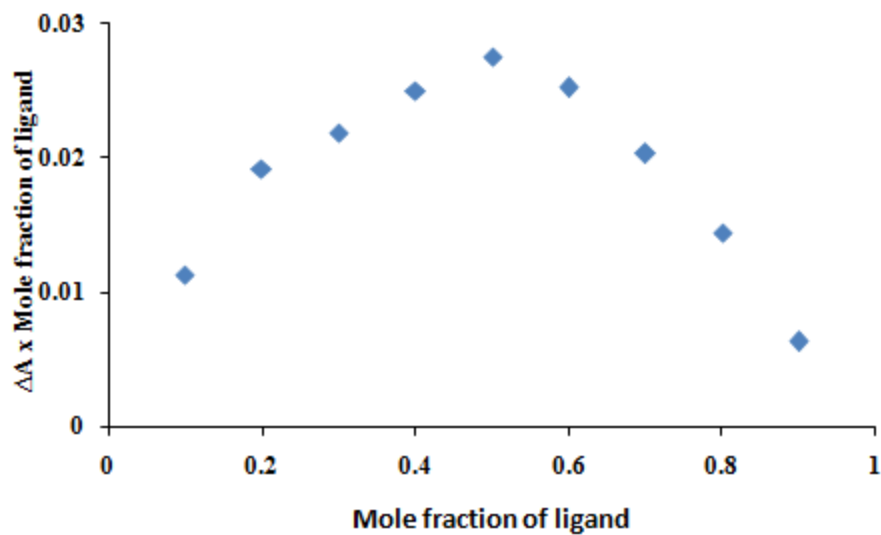

(a)

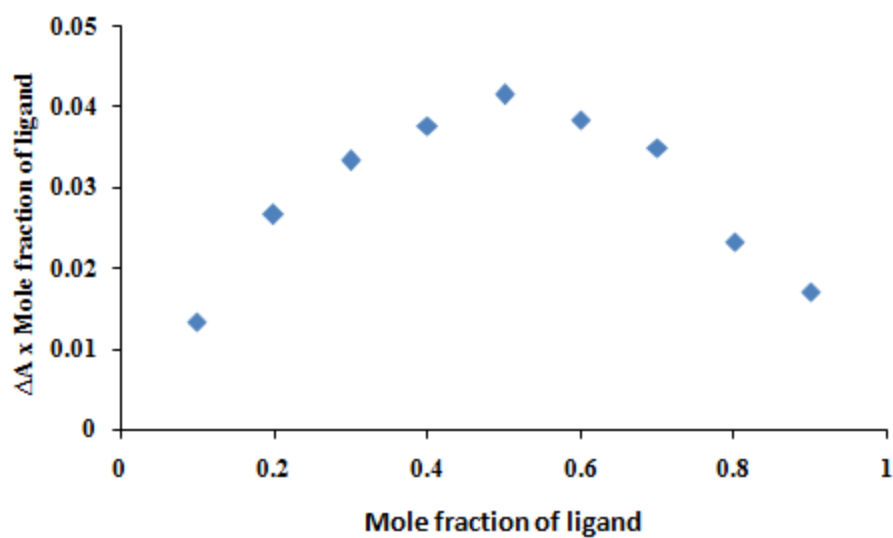

(b)

**Figure S7:** Job's plot <sup>4</sup> for (a) **1-Fe<sup>3+</sup>** and (b) **1-Cu<sup>2+</sup>** (absorbance values were recorded at 297 nm).

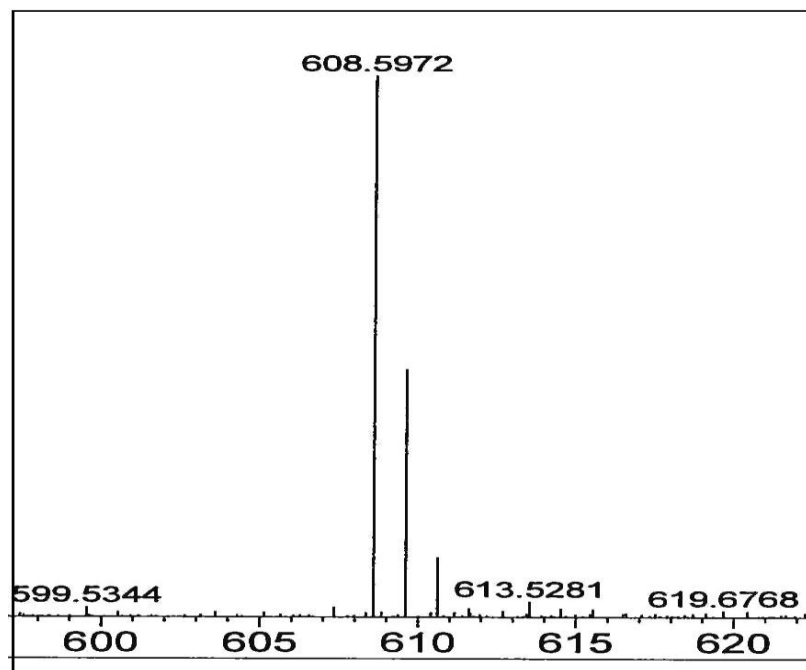

**Figure S8(a):** ESI- mass spectra of  $1\text{-Fe}^{3+}$  complex

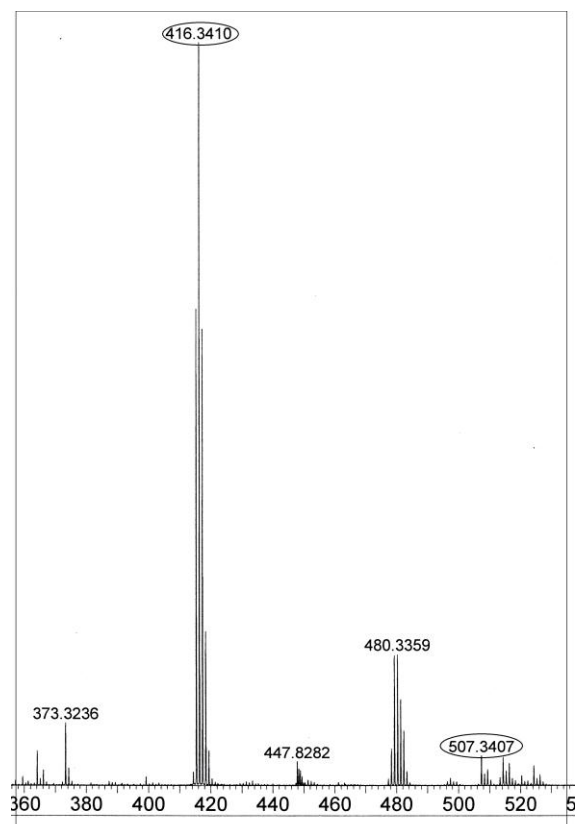

**Figure S8(b):** ESI- mass spectra of **1**-Cu<sup>2+</sup> complex.

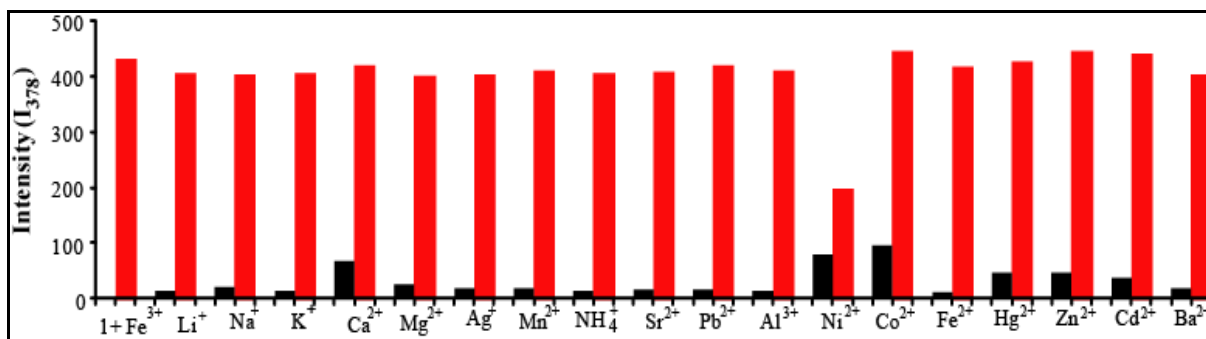

**Figure S9a:** Fluorescence response of compound **1** towards Fe<sup>3+</sup> in the presence of excess (100 μM) of other cations. Red bars indicate the addition of Fe<sup>3+</sup>.

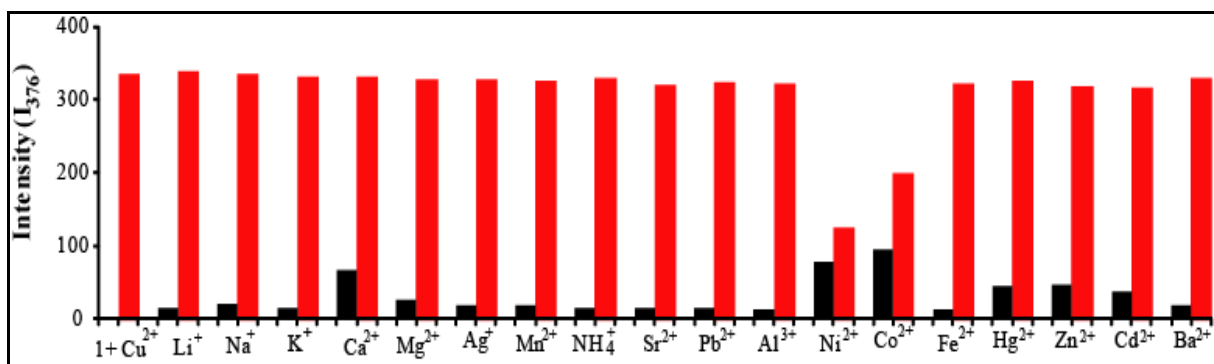

**Figure S9b:** Fluorescence response of compound **1** towards Cu<sup>2+</sup> in the presence of excess (100 μM) of other cations. Red bars indicate the addition of Cu<sup>2+</sup>.

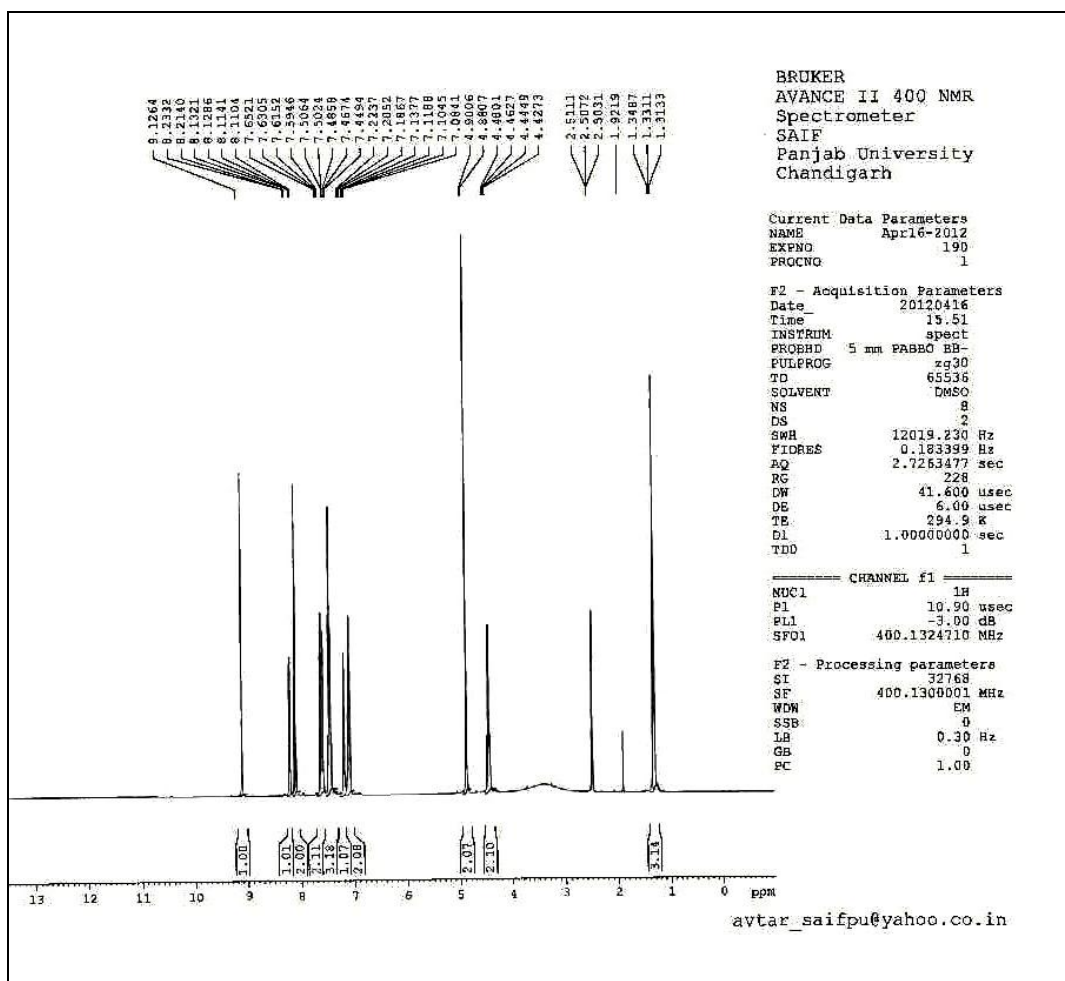

Fig S10: <sup>1</sup>H NMR of compound 1

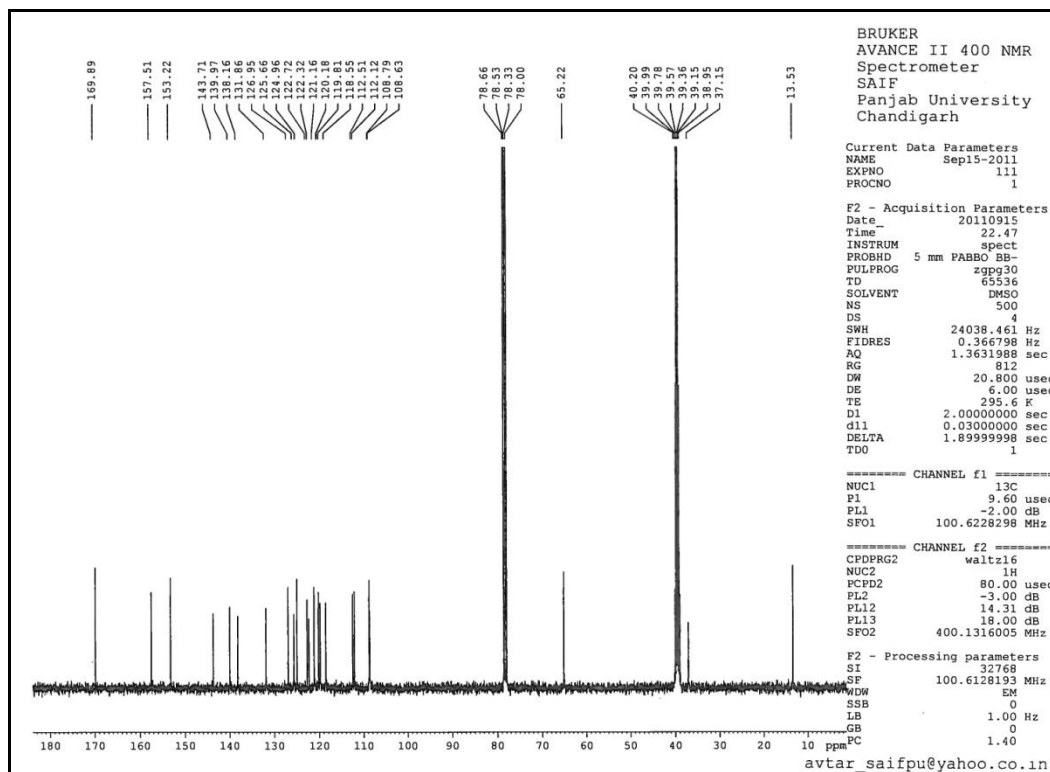

Fig S11:  $^{13}\text{C}$  NMR of compound 1

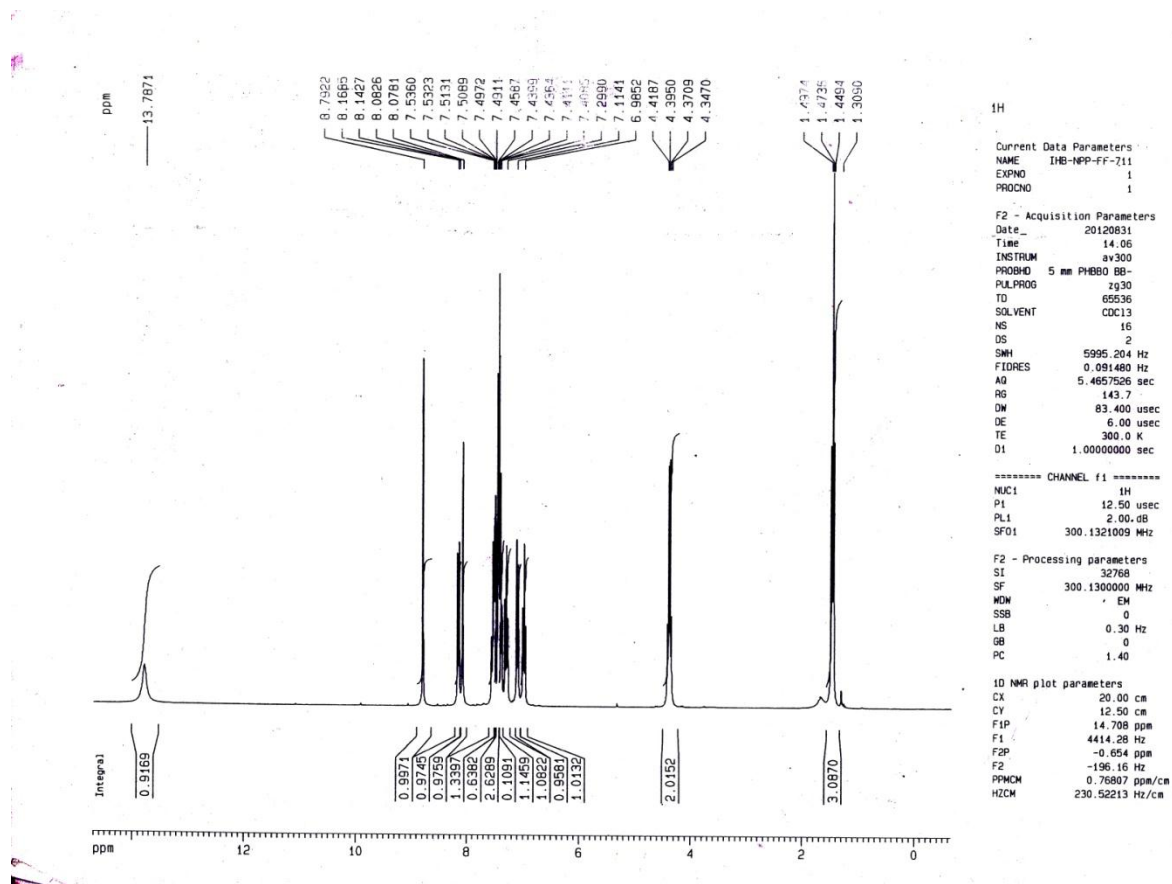

Fig S12: <sup>1</sup>H NMR of compound 5



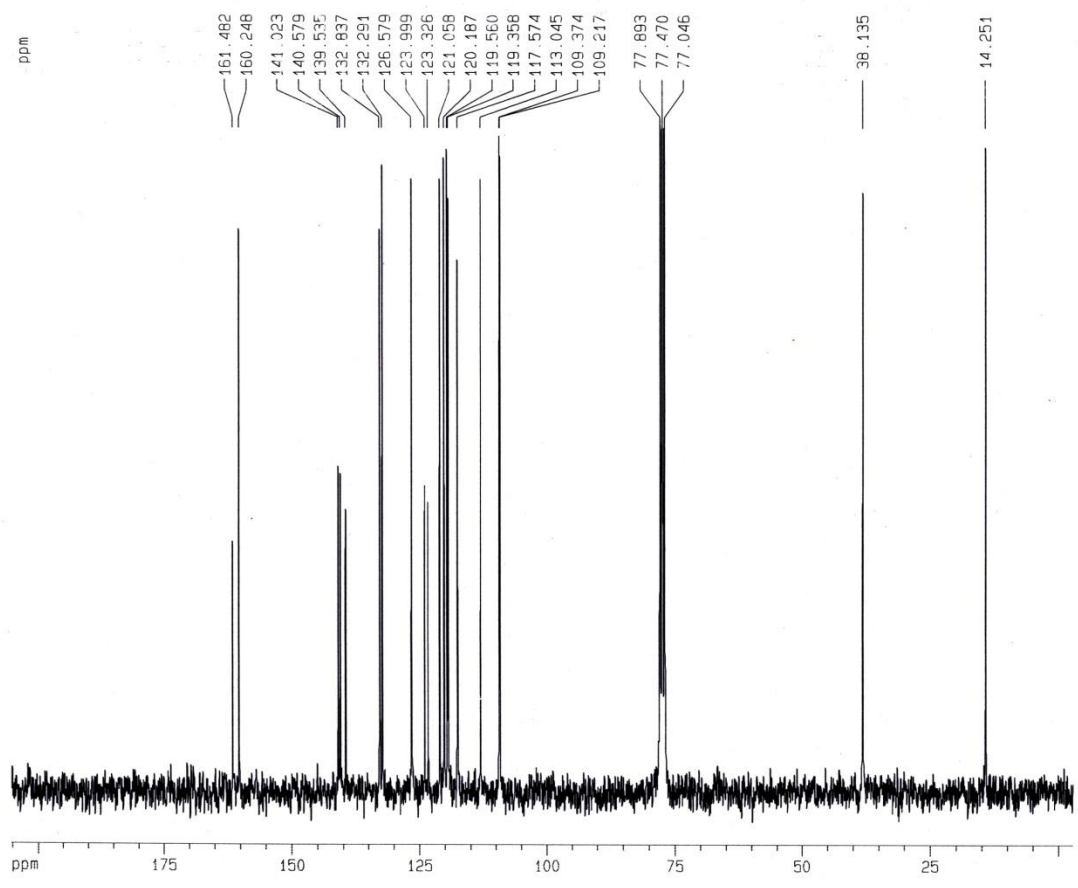

Current Data Parameters  
NAME IHB-NPP-FF-711  
EXPNO 2  
PROCNO 1

F2 - Acquisition Parameters  
Date\_ 20120631  
Time 14.50  
INSTRUM av300  
PROBHD 5 mm PHBBO BB-  
PULPROG zgpg30  
TD 65536  
SOLVENT CDCl3  
NS 1024  
DS 4  
SWH 18115.941 Hz  
FIDRES 0.276427 Hz  
AQ 1.8088436 sec  
RG 32768  
DW 27.600 usec  
DE 6.00 usec  
TE 300.0 K  
D1 2.00000000 sec  
d11 0.03000000 sec  
d12 0.00002000 sec

===== CHANNEL f1 =====  
NUC1 13C  
P1 9.35 usec  
PL1 -5.00 dB  
SF01 75.4760204 MHz

===== CHANNEL f2 =====  
CPOPRG2 waltz16  
NUC2 1H  
PCPD2 80.00 usec  
PL2 2.00 dB  
PL12 18.00 dB  
PL13 22.00 dB  
SF02 300.1312005 MHz

F2 - Processing parameters  
SI 32768  
SF 75.4677190 MHz  
WDW EM  
SSB 0  
LB 3.00 Hz  
GB 0  
PC 1.40

1D NMR plot parameters  
CX 20.00 cm  
CY 12.50 cm  
F1P 205.237 ppm  
F1 15488.75 Hz  
F2P -2.849 ppm  
F2 -215.02 Hz  
PPMCM 10.40429 ppm/cm  
HZCM 785.18829 Hz/cm

Fig S13: <sup>13</sup>C NMR of compound 5

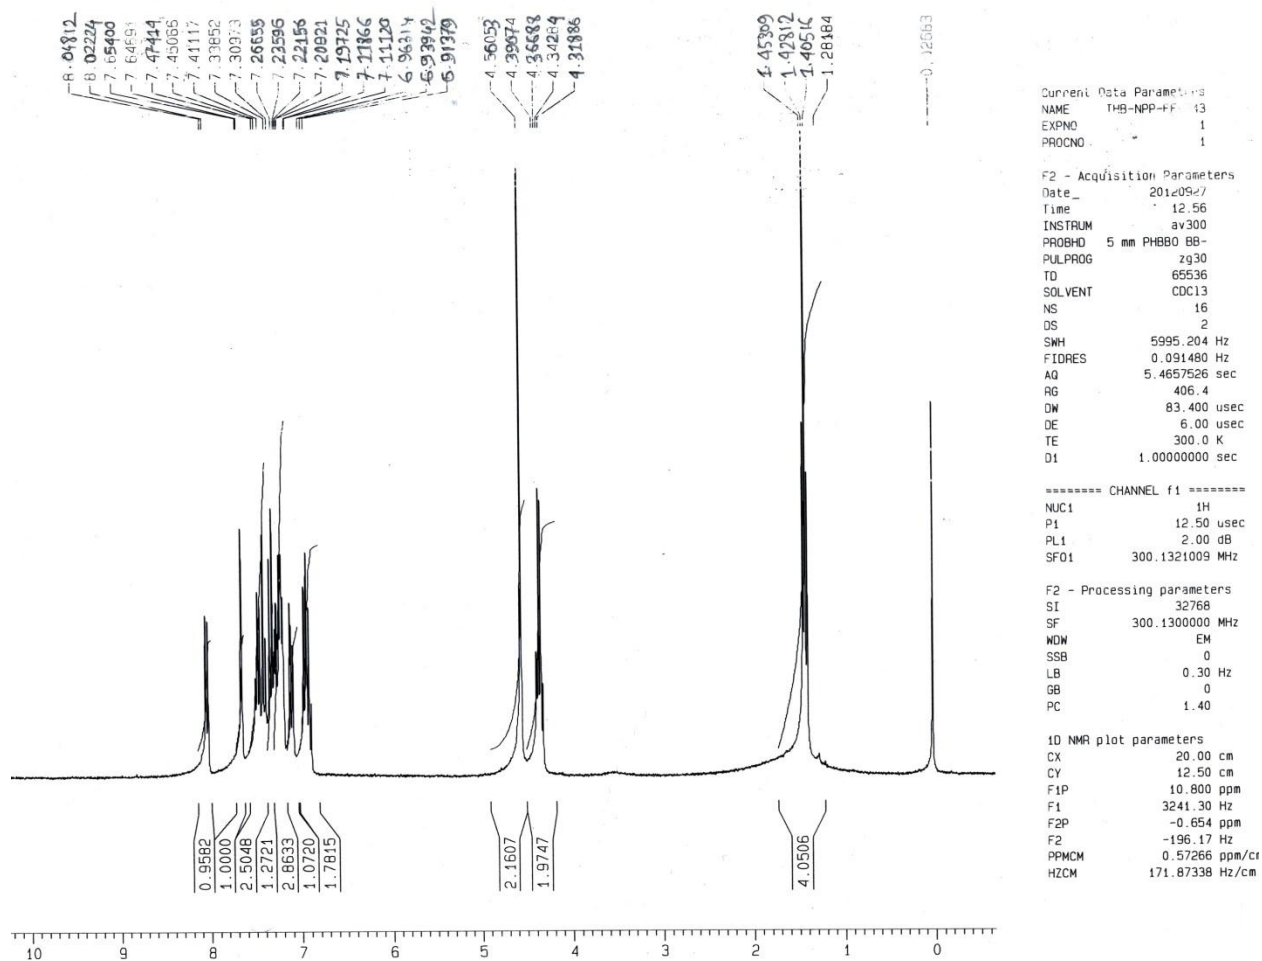

Fig S14:  $^1\text{H}$  NMR of compound 6

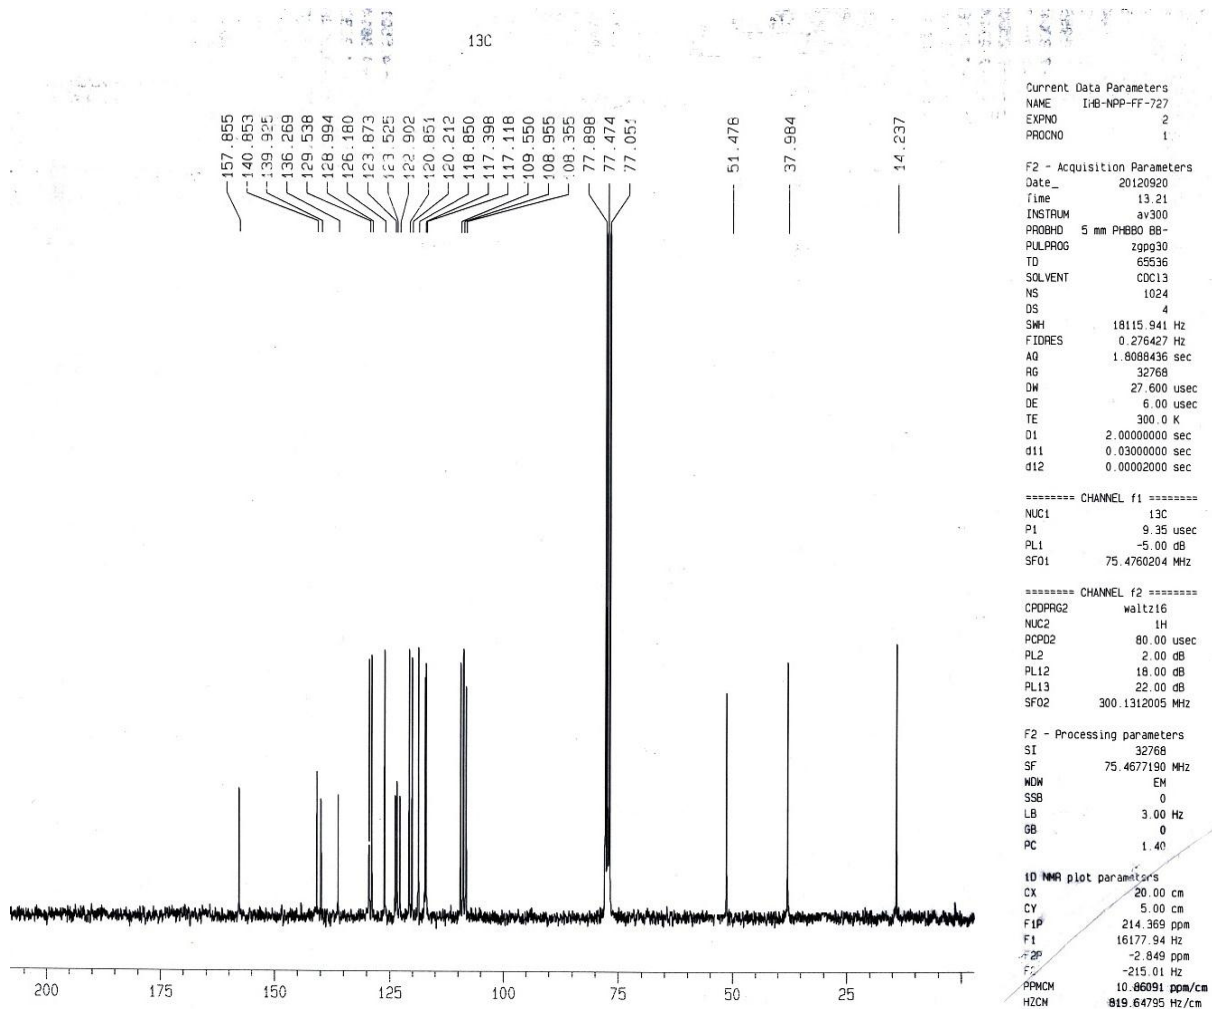

Fig S15:  $^{13}\text{C}$  NMR of compound 6

## References:

1. H. Liu, X. –B. Shao, M. –X. Jia, X. –K. Jiang, Z. –T. Li, G. –J. *Tetrahedron*, 2005, **61**, 8095-8100.
2. A. Caballero, R. Martinez, V. Lloveras, I. Ratera, J. Vidal-Gancedo, K. Wurst, A. Tárraga, P. Molina, J. Veciana, *J. Am. Chem. Soc.*, 2005, **127**, 15666-15667.
3. H. A. Benesi, J. H. Hildebrand, *J. Am. Chem. Soc.*, 1949, **71**, 2703.
4. P. Job, *Ann. Chim. Applicata*, 1928, **9**, 113-203.
